# Supplementary material
Source: publisher figshare collection journal article supplement (https://frontiersin.figshare.com/ndownloader/files/12363134)
Supplement: Supplementary file [file 12363134]

## *Supplementary Material*

### **Supplementary material 1**

#### Enzyme analysis

For PPO activity analysis, the reaction mixture consisted of 1 mL enzyme solution, 2 mL citrate buffer pH 5.6, 0.4 mL 0.1% proline and 0.6 mL 1% catechol, and was incubated at 37°C for 10 min. After the reaction was stopped by adding 1 mL 1 mol/L trichloroacetic acid and centrifuged at 15000g for 10 min at 4°C, the enzyme activity was measured at 460 nm against a blank solution. One unit (U) of PPO activity was defined as the amount of enzyme catalyzing increase of 0.1 absorbance per min of 1g sample.

For POD activity analysis, the reaction mixture consisted of 0.5 mL enzyme solution, 1.5 mL 0.05 M acetic acid buffer pH 4.75, 1 mL 0.3% guaiacol and 1 mL 0.3% hydrogen peroxide, and was incubated at 35°C for 5 min. The enzyme activity was measured at 470 nm against a blank solution. One unit (U) of POD activity was defined as the amount of enzyme catalyzing increase of 0.1 absorbance per min of 1g sample.

For CEL activity analysis, the reaction mixture consisted of 1 mL enzyme solution, 4 mL sodium carboxymethylcellulose solution and incubated at 50°C for 30 min. Then added 1 mL 2M NaOH and 2.5 mL dinitrosalicylic acid (DNS) solution and the enzyme activity was measured at 520 nm against glucose standards curve. One unit (U) of CEL activity was defined as the amounts of enzyme produced 1 mg glucose per min of 1g sample.

For PEC activity analysis, the reaction mixture consisted of 0.5 mL enzyme solution, 1 mL acetic acid buffer pH 4.8, 0.5 mL pectin solution and was incubated at 48°C for 30 min. Then placed in boiled water for 5 min and added 2.5 mL DNS solution. The PEC activity was measured at 540 nm against galacturonic acid standards curve. One unit (U) of PEC activity was defined as the amounts of enzyme produced 1 mg galacturonic acid per min of 1g sample.
